# Supplementary material
Source: ML conference proceedings conference paper supplement (https://openreview.net/forum?id=N59cvpjnlo)
Supplement: supplementary_material [file model_costs_and_tokens.xlsx]

## Sheet: model_costs_and_tokens
question_id	gpt-4.1-nano_cost	o4-mini_cost	gpt-4.1_cost	gpt-4o_cost	gpt-4.1-mini_cost	gemini-1.5-pro_cost	gpt-4o-mini_cost	gemini-1.5-flash_cost	o1_cost	gemini-2.0-flash_cost
0	7.74e-05	0.0012111	0.001548	0.001935	0.0003096	0.00100375	0.0001161	6.348e-05	0.019935	0.00011985
1	6.82e-05	0.0011099	0.001364	0.001705	0.0002728	0.000885	0.0001023	5.582e-05	0.018495	0.0001056
2	5.29e-05	0.000902	0.000986	0.0012325	0.0001972	0.00064625	7.395e-05	4.082e-05	0.00798	7.695e-05
3	6.36e-05	0.0016401	0.001272	0.00159	0.0002512	0.0008175	9.54e-05	5.094e-05	0.017745	9.75e-05
4	7.47e-05	0.0014454	0.001462	0.0018275	0.0003052	0.0009625	0.00010965	6.078e-05	0.01629	0.0001149
5	7.82e-05	0.0023507	0.001572	0.001975	0.0003144	0.00111875	0.0001185	7.034e-05	0.027735	0.00013365
6	7.4e-05	0.0011737	0.00148	0.00185	0.000296	0.00095	0.000111	5.996e-05	0.019365	0.0001134
7	7.52e-05	0.0020317	0.001504	0.00188	0.0003008	0.00095625	0.0001104	6.172e-05	0.035025	0.00011415
8	7.82e-05	0.0015103	0.001548	0.001955	0.0003096	0.0010575	0.0001173	6.642e-05	0.016035	0.0001287
9	6.19e-05	0.001067	0.001254	0.0016075	0.0002508	0.00082625	9.405e-05	5.194e-05	0.01791	0.00010095
10	7.69e-05	0.00253	0.001362	0.0016425	0.0003076	0.0010375	0.00010395	6.674e-05	0.04548	0.0001119
11	7.04e-05	0.0014157	0.001408	0.00176	0.0002816	0.00090875	0.0001056	5.742e-05	0.011145	0.00010845
12	8.72e-05	0.0021637	0.001744	0.00218	0.0003488	0.00121	0.0001308	7.586e-05	0.021345	0.0001446
13	5.72e-05	0.0021637	0.001232	0.00154	0.0002464	0.0008025	9.24e-05	5.768e-05	0.017505	9.57e-05
14	7.97e-05	0.0009548	0.001594	0.0019925	0.0003188	0.0010675	0.00011955	6.742e-05	0.0126	0.0001275
15	7.18e-05	0.0017127	0.001436	0.001795	0.0002872	0.00099	0.0001077	6.22e-05	0.022875	0.0001182
16	7.94e-05	0.0012287	0.00158	0.001975	0.000316	0.00103125	0.0001185	6.516e-05	0.016575	0.00012315
17	7.43e-05	0.0014586	0.001486	0.0018575	0.0002972	0.00102125	0.00010965	6.406e-05	0.02325	0.00012195
18	5.43e-05	0.000957	0.001086	0.0013575	0.0002172	0.0006975	7.905e-05	4.398e-05	0.02025	8.31e-05
19	6.67e-05	0.0010934	0.001334	0.0016675	0.0002668	0.00083875	0.00010005	5.3e-05	0.02601	0.00010005
20	6.45e-05	0.0010692	0.00129	0.0016125	0.000258	0.00081375	9.675e-05	5.146e-05	0.01794	9.705e-05
21	6.72e-05	0.0018865	0.001192	0.00206	0.0002384	0.00078625	8.94e-05	4.966e-05	0.044085	9.375e-05
22	6.55e-05	0.0010802	0.00131	0.0016375	0.000262	0.00085125	9.825e-05	5.378e-05	0.01809	0.00010155
23	7.86e-05	0.0017875	0.001572	0.001965	0.0003144	0.00103875	0.0001179	6.674e-05	0.019935	0.00012405
24	6.17e-05	0.00132	0.001234	0.0015425	0.0002468	0.0007975	9.255e-05	5.028e-05	0.04452	9.51e-05
25	7.84e-05	0.0017897	0.001576	0.00197	0.0003152	0.00101875	0.0001182	6.434e-05	0.016245	0.00012165
26	7.23e-05	0.002563	0.001446	0.0018075	0.0002892	0.00114125	0.00010845	7.908e-05	0.02709	0.00011175
27	6.16e-05	0.0007557	0.001232	0.00154	0.0002464	0.00080625	9.24e-05	5.074e-05	0.017505	9.615e-05
28	6.34e-05	0.0010571	0.001268	0.001585	0.0002536	0.000815	9.51e-05	5.146e-05	0.025455	9.72e-05
29	5.46e-05	0.0009603	0.001092	0.001365	0.0002184	0.00071625	8.31e-05	4.446e-05	0.020295	8.475e-05
30	5.85e-05	0.0010032	0.00117	0.0014625	0.000234	0.000765	8.775e-05	4.836e-05	0.0132	9.12e-05
31	5.61e-05	0.0006952	0.001122	0.0014025	0.0002244	0.00074375	8.415e-05	4.696e-05	0.01668	8.865e-05
32	5.82e-05	0.0012595	0.001124	0.001405	0.0002248	0.0007375	8.43e-05	4.654e-05	0.021615	8.79e-05
33	5.89e-05	0.0012892	0.001178	0.0014725	0.0002356	0.0007675	8.835e-05	4.838e-05	0.0171	9.15e-05
34	5.98e-05	0.0010175	0.001196	0.001495	0.0002392	0.00078	8.85e-05	4.926e-05	0.017235	9.3e-05
35	6.2e-05	0.0010197	0.0012	0.0015	0.000248	0.00078625	9e-05	4.962e-05	0.017565	9.375e-05
36	6.59e-05	0.0010626	0.001278	0.0015975	0.000254	0.00085625	9.585e-05	5.404e-05	0.02943	0.00010575
37	7.15e-05	0.0011462	0.00143	0.0017875	0.000286	0.00094875	0.00010725	6e-05	0.02697	0.00021105
38	6.22e-05	0.0027467	0.001244	0.001555	0.0002488	0.00081625	9.33e-05	5.154e-05	0.029115	9.735e-05
39	6.02e-05	0.0013035	0.001204	0.001505	0.0002408	0.00081	9.03e-05	5.1e-05	0.017295	9.66e-05
40	7.05e-05	0.00198	0.00141	0.0017625	0.000282	0.00091125	0.00010575	5.758e-05	0.08412	0.00010395
41	6.76e-05	0.0011033	0.001352	0.00169	0.0002704	0.00089125	0.0001014	5.634e-05	0.015345	0.00010635
42	6.31e-05	0.0010582	0.00127	0.0015875	0.000254	0.00084875	9.525e-05	5.338e-05	0.01395	0.00010125
43	6.79e-05	0.0013926	0.001366	0.0017075	0.0002732	0.00089	0.00010245	5.62e-05	0.01851	0.0001068
44	7.18e-05	0.0011011	0.001348	0.001685	0.0002696	0.0009	0.0001011	5.684e-05	0.014535	0.0001074
45	5.45e-05	0.0017996	0.001082	0.0013525	0.0002164	0.00071	8.115e-05	4.468e-05	0.01638	8.46e-05
46	6.37e-05	0.0010604	0.001274	0.0015925	0.0002548	0.00082375	9.555e-05	5.082e-05	0.02178	9.885e-05
47	6.98e-05	0.0013915	0.001364	0.001705	0.0002728	0.00087625	0.0001023	5.518e-05	0.014475	0.00010455
48	6.18e-05	0.0016071	0.001252	0.001565	0.0002472	0.000815	9.27e-05	5.102e-05	0.013815	9.72e-05
49	8.14e-05	0.0015367	0.001628	0.002035	0.0003256	0.00105625	0.0001221	6.672e-05	0.020775	0.00012615
50	6.79e-05	0.0016698	0.001358	0.0016975	0.0002716	0.000875	0.00010185	5.536e-05	0.01461	0.0001044
51	7.07e-05	0.001419	0.001414	0.0017675	0.0002828	0.00090875	0.00010245	5.742e-05	0.03069	0.00011205
52	5.61e-05	0.0009724	0.001114	0.0013925	0.0002228	0.000755	8.355e-05	4.754e-05	0.01278	9e-05
53	6.84e-05	0.0013937	0.001592	0.00171	0.0002752	0.00107375	0.0001032	5.746e-05	0.041505	0.00012765
54	5.95e-05	0.0015774	0.00115	0.0014875	0.000238	0.00074	8.625e-05	4.668e-05	0.01719	8.82e-05
55	5.38e-05	0.0009515	0.001076	0.001345	0.0002152	0.00068875	8.07e-05	4.35e-05	0.016335	8.205e-05
56	7.05e-05	0.0011352	0.00141	0.0017625	0.000282	0.00091125	0.00010575	5.918e-05	0.015	0.00019215
57	7.08e-05	0.0011385	0.001416	0.00177	0.0002832	0.00092625	0.0001062	5.836e-05	0.015045	0.00011055
58	5.31e-05	0.0012386	0.00107	0.0013475	0.0002172	0.00069	8.145e-05	4.352e-05	0.04317	8.22e-05
59	5.83e-05	0.001001	0.001166	0.0014575	0.0002332	0.00074375	8.745e-05	4.666e-05	0.02853	8.865e-05
60	6.49e-05	0.0010736	0.001298	0.0016225	0.0002596	0.00083875	9.735e-05	5.302e-05	0.01416	0.00010005
61	6.88e-05	0.0013981	0.00136	0.0017	0.0002752	0.00086625	0.0001032	5.46e-05	0.014625	0.00010455
62	6.18e-05	0.0013211	0.001236	0.001545	0.0002472	0.00079125	9.27e-05	4.952e-05	0.017595	9.435e-05
63	6.19e-05	0.0013222	0.001238	0.0015475	0.0002476	0.00079875	9.285e-05	5.048e-05	0.01755	9.525e-05
64	6.46e-05	0.0010703	0.001292	0.001615	0.0002584	0.0008775	9.69e-05	5.532e-05	0.019215	0.0001047
65	6.73e-05	0.0010824	0.001314	0.0016425	0.0002628	0.00084625	9.855e-05	5.35e-05	0.01812	0.00010095
66	6.83e-05	0.0013926	0.001366	0.0017075	0.0002732	0.0008925	0.00010245	5.63e-05	0.01851	0.0001065
67	6.07e-05	0.0010274	0.001214	0.0015175	0.0002428	0.00079375	9.105e-05	5.002e-05	0.01743	9.525e-05
68	6.1e-05	0.0016071	0.001244	0.001555	0.0002488	0.000795	9.33e-05	5.082e-05	0.029115	9.6e-05
69	8e-05	0.0015213	0.0016	0.002	0.0003392	0.00105625	0.00012	6.664e-05	0.016425	0.00012615
70	7.6e-05	0.0014729	0.001512	0.00189	0.0003024	0.0009675	0.000111	6.122e-05	0.019665	0.0001155
71	6.23e-05	0.001045	0.001246	0.0015575	0.0002492	0.00081875	9.345e-05	5.174e-05	0.01377	9.765e-05
72	5.85e-05	0.0010032	0.00117	0.0014625	0.000234	0.0007975	8.775e-05	5.024e-05	0.0132	9.51e-05
73	5.36e-05	0.0008833	0.000952	0.00119	0.0001904	0.00059625	7.14e-05	3.76e-05	0.011685	7.155e-05
74	6.38e-05	0.0013519	0.001276	0.001595	0.0002552	0.00081	9.33e-05	5.104e-05	0.021675	9.9e-05
75	6.62e-05	0.0013695	0.001324	0.001655	0.0002648	0.00083	9.69e-05	5.256e-05	0.037455	0.000102
76	5.64e-05	0.0033121	0.001288	0.00164	0.0002512	0.00078875	0.0001218	4.986e-05	0.130485	0.00011985
77	6.96e-05	0.0016929	0.0014	0.00175	0.00028	0.0008825	0.000105	5.576e-05	0.026445	0.0001053
78	7.19e-05	0.0011506	0.001438	0.0017975	0.0002844	0.0008825	0.00010785	5.658e-05	0.01905	0.0001077
79	5.44e-05	0.0012485	0.001104	0.00138	0.0002208	0.0007125	8.28e-05	4.486e-05	0.020385	8.31e-05
80	7.52e-05	0.0014685	0.001504	0.00188	0.0003104	0.00093875	0.0001128	5.894e-05	0.019665	0.00011205
81	6.79e-05	0.0011066	0.001358	0.0016975	0.0002716	0.00087125	0.00010185	5.462e-05	0.01461	0.00010395
82	5.75e-05	0.0012738	0.00115	0.0014375	0.00023	0.00075875	8.625e-05	4.792e-05	0.01305	9.045e-05
83	6.75e-05	0.0013838	0.00135	0.0016875	0.00027	0.0009125	0.00010125	5.756e-05	0.03861	0.0001089
84	6.22e-05	0.0010439	0.001244	0.001555	0.0002488	0.0007775	9.33e-05	4.902e-05	0.017715	9.27e-05
85	6.14e-05	0.0007535	0.001228	0.001535	0.0002456	0.00079375	9.21e-05	5.002e-05	0.013635	9.465e-05
86	6.47e-05	0.0010714	0.001294	0.0016175	0.0002588	0.0008325	9.705e-05	5.264e-05	0.01413	9.93e-05
87	6.64e-05	0.0013717	0.001328	0.00166	0.000264	0.0008775	9.96e-05	5.542e-05	0.018225	0.0001047
88	6.11e-05	0.0013134	0.001222	0.0015275	0.0002444	0.00083375	9.165e-05	5.252e-05	0.02127	9.945e-05
89	8.14e-05	0.0012507	0.001628	0.002035	0.0003256	0.0010325	0.0001191	6.53e-05	0.020535	0.0001233
90	6.53e-05	0.0013596	0.00129	0.0016325	0.0002612	0.000855	9.795e-05	5.394e-05	0.02964	0.000102
91	5.36e-05	0.0009493	0.001072	0.00134	0.0002144	0.0006975	8.04e-05	4.37e-05	0.023985	8.25e-05
92	7.11e-05	0.0034166	0.001686	0.0017875	0.0002924	0.00092625	0.00013485	5.914e-05	0.14547	0.00011235
93	7.35e-05	0.0034078	0.001446	0.0017675	0.0002844	0.00091375	0.00010605	5.67e-05	0.02835	0.00011865
94	7.67e-05	0.0015026	0.001566	0.0019575	0.0003132	0.000995	0.00011745	6.278e-05	0.03549	0.0001188
95	6.39e-05	0.0013266	0.001246	0.0015575	0.0002492	0.00085625	9.345e-05	5.416e-05	0.01377	0.00010215
96	7.73e-05	0.00121	0.001546	0.0019325	0.0003092	0.000995	0.00011595	6.298e-05	0.01602	0.0001188
97	5.88e-05	0.0009889	0.001144	0.00143	0.0002288	0.00076125	8.58e-05	4.816e-05	0.013065	9.075e-05
98	8.44e-05	0.0012705	0.001656	0.00207	0.0003312	0.00105375	0.0001242	6.692e-05	0.032205	0.00012585
99	5.88e-05	0.0010065	0.001216	0.00152	0.0002432	0.00075125	8.82e-05	4.742e-05	0.017385	8.955e-05
100	5.66e-05	0.0007007	0.001132	0.001415	0.0002264	0.00075	8.49e-05	4.732e-05	0.009075	8.94e-05
101	5.5e-05	0.0009647	0.0011	0.001375	0.00022	0.00072625	8.25e-05	4.582e-05	0.012795	8.655e-05
102	7.41e-05	0.0011748	0.001482	0.0018525	0.0002964	0.00095875	0.00011115	6.06e-05	0.01938	0.00011445
103	8.35e-05	0.0015378	0.00163	0.0020375	0.0003356	0.00108	0.00012225	6.842e-05	0.02859	0.000129
104	8.08e-05	0.0012485	0.001616	0.00202	0.0003232	0.0010425	0.0001212	6.596e-05	0.024525	0.0001257
105	7.3e-05	0.0011627	0.00146	0.001825	0.000292	0.000945	0.0001095	5.986e-05	0.023055	0.0001128
106	8.97e-05	0.001628	0.001794	0.0022425	0.0003588	0.0011575	0.00013455	7.336e-05	0.01788	0.0001383
107	5.8e-05	0.0009977	0.00116	0.00145	0.000232	0.00076	8.7e-05	4.802e-05	0.020805	9.06e-05
108	6.21e-05	0.0010428	0.001242	0.0015525	0.0002484	0.00081875	9.075e-05	5.172e-05	0.01758	9.765e-05
109	7.56e-05	0.0017545	0.001512	0.00185	0.0003024	0.00095	0.000111	6.016e-05	0.027345	0.0001134
110	5.99e-05	0.0010186	0.001198	0.0014975	0.0002396	0.0008025	8.985e-05	5.064e-05	0.01737	9.63e-05
111	6.74e-05	0.0013827	0.001348	0.001685	0.0002696	0.00086625	0.0001011	5.47e-05	0.018495	0.00010335
112	5.78e-05	0.0009955	0.001156	0.001445	0.0002312	0.0007525	8.67e-05	4.732e-05	0.017055	8.97e-05
113	0.0001017	0.002046	0.002042	0.0025525	0.0004084	0.00130125	0.00015315	8.234e-05	0.02742	0.00015615
114	7.65e-05	0.0014872	0.001538	0.0019225	0.0003076	0.0009525	0.00011535	6.024e-05	0.01596	0.0001137
115	9.26e-05	0.0013783	0.001852	0.002315	0.0003704	0.0011875	0.0001389	7.486e-05	0.022155	0.0001419
116	5.76e-05	0.0009757	0.00112	0.0014	0.000232	0.00073375	8.4e-05	4.632e-05	0.016785	8.745e-05
117	7.92e-05	0.0012309	0.001584	0.00198	0.0003168	0.0010425	0.0001188	6.598e-05	0.020145	0.0001245
118	8.7e-05	0.0015983	0.00174	0.002175	0.0003464	0.0011425	0.0001305	7.23e-05	0.021495	0.0001365
119	0.0001061	0.0015224	0.002122	0.0026525	0.000426	0.00137375	0.00015915	8.814e-05	0.0276	0.00016305
120	9.48e-05	0.0019701	0.001904	0.00238	0.0003808	0.0012625	0.0001428	8.014e-05	0.030225	0.0001509
121	6.93e-05	0.0014036	0.001386	0.0017325	0.0002772	0.0009125	0.00010395	5.776e-05	0.0225	0.0001089
122	9.4e-05	0.0022385	0.00188	0.00235	0.0003856	0.00121	0.000141	7.656e-05	0.018405	0.0001446
123	7.34e-05	0.0017127	0.001436	0.001795	0.0002872	0.00092875	0.0001077	5.876e-05	0.019395	0.00019185
124	7.25e-05	0.0011616	0.001458	0.0018225	0.0002916	0.0009525	0.00010935	6.022e-05	0.02442	0.0001137
125	8.92e-05	0.0016225	0.001784	0.00223	0.0003568	0.00115875	0.0001338	7.104e-05	0.028845	0.00013845
126	8.18e-05	0.0017743	0.00158	0.001975	0.0003368	0.00107875	0.0001185	6.802e-05	0.016035	0.00012885
127	8.89e-05	0.0013376	0.001778	0.0022225	0.0003556	0.00122625	0.00013335	7.732e-05	0.0408	0.00014655
128	9.94e-05	0.0017347	0.001988	0.002485	0.0003976	0.00140125	0.0001491	8.846e-05	0.015495	0.00016755
129	7.45e-05	0.0017424	0.00149	0.0018425	0.0003076	0.000995	0.00011175	6.264e-05	0.027	0.0001182
130	7.43e-05	0.001177	0.001486	0.0018575	0.0002972	0.00099875	0.00011145	6.296e-05	0.01563	0.00011925
131	8.23e-05	0.0012518	0.001622	0.0020275	0.0003292	0.001065	0.00012165	6.73e-05	0.02463	0.0001272
132	8.01e-05	0.0015224	0.001602	0.0020025	0.0003316	0.0010725	0.00012015	6.764e-05	0.01644	0.0001281
133	6.24e-05	0.0013277	0.001248	0.00156	0.0002576	0.00082875	9.36e-05	5.208e-05	0.013785	0.00010305
134	9.49e-05	0.001122	0.001898	0.0023725	0.0003796	0.0012675	0.00014235	8.05e-05	0.01878	0.0001515
135	6.2e-05	0.0010373	0.001232	0.00154	0.0002576	0.000835	9.24e-05	5.25e-05	0.017505	9.96e-05
136	6.39e-05	0.0010626	0.001286	0.0016075	0.0002572	0.0008475	9.645e-05	5.306e-05	0.02169	0.0001011
137	8.42e-05	0.0021307	0.001684	0.002105	0.0003368	0.0010825	0.0001263	6.958e-05	0.017055	0.0001311
138	7.46e-05	0.0014355	0.00158	0.001975	0.0003	0.0009625	0.0001083	6.09e-05	0.023055	0.0001161
139	9.31e-05	0.0019514	0.00187	0.0023375	0.0003724	0.00124625	0.00014025	7.888e-05	0.01845	0.00014895
140	7.15e-05	0.0014278	0.00143	0.0017875	0.000286	0.00096	0.00010725	6.066e-05	0.01941	0.0001146
141	6.83e-05	0.0016742	0.001366	0.0017075	0.0002732	0.00092375	0.00011025	5.834e-05	0.13029	0.00011025
142	6.07e-05	0.001309	0.001214	0.0015175	0.0002428	0.00078375	9.105e-05	4.95e-05	0.01083	9.345e-05
143	9.38e-05	0.0013959	0.001876	0.002355	0.0003768	0.00127875	0.0001413	8.176e-05	0.033915	0.00015525
144	5.51e-05	0.0009658	0.001102	0.0013775	0.0002204	0.00073875	8.265e-05	4.652e-05	0.02805	8.805e-05
145	8e-05	0.0012441	0.0016	0.002	0.000328	0.00105625	0.00012	6.676e-05	0.031785	0.00012615
146	6.03e-05	0.0013046	0.00119	0.0015075	0.0002412	0.0007875	9.045e-05	4.96e-05	0.02145	9.09e-05
147	7.78e-05	0.0014927	0.001556	0.001945	0.0003112	0.0010125	0.0001167	6.36e-05	0.016095	0.0001209
148	5.65e-05	0.0009812	0.00113	0.0014125	0.000226	0.0007525	8.475e-05	4.744e-05	0.02466	8.97e-05
149	9.47e-05	0.0018986	0.001774	0.0022175	0.0003548	0.0011525	0.00013305	7.294e-05	0.02577	0.0001377
150	0.0001026	0.0017699	0.002052	0.002565	0.0004104	0.00134375	0.0001539	8.504e-05	0.031335	0.00016065
151	7.84e-05	0.0020757	0.001568	0.00196	0.0003296	0.00100125	0.0001176	6.294e-05	0.027885	0.00011955
152	7.14e-05	0.0017083	0.001428	0.001785	0.0002856	0.00097	0.0001071	6.07e-05	0.018975	0.0001158
153	6.78e-05	0.0011187	0.00138	0.001725	0.000276	0.00090125	0.0001017	5.704e-05	0.018615	0.00010755
154	8.9e-05	0.0016247	0.001788	0.002235	0.0003576	0.0011975	0.0001341	7.408e-05	0.021675	0.0001431
155	7.06e-05	0.0011319	0.001404	0.001755	0.0002808	0.0009	0.0001053	5.7e-05	0.014955	0.0001074
156	7.36e-05	0.0014509	0.001472	0.00184	0.0002944	0.00097625	0.0001104	6.16e-05	0.023145	0.00011655
157	5.64e-05	0.0012617	0.001128	0.00141	0.0002256	0.00073	8.46e-05	4.604e-05	0.013245	8.7e-05
158	9.29e-05	0.0019448	0.001858	0.0023225	0.0003716	0.00121875	0.00013935	7.714e-05	0.01836	0.00014565
159	7.33e-05	0.001166	0.001466	0.0018325	0.0002932	0.00096875	0.00010995	6.118e-05	0.0231	0.00011565
160	8.56e-05	0.0013013	0.001712	0.00214	0.0003424	0.00110125	0.0001284	6.978e-05	0.025065	0.00013155
161	8.32e-05	0.0021021	0.001616	0.00202	0.0003264	0.00102125	0.0001248	6.62e-05	0.039885	0.00012615
162	6.43e-05	0.001067	0.001286	0.0016075	0.0002572	0.00084375	9.645e-05	5.31e-05	0.02163	0.00010065
163	6.4e-05	0.0024717	0.00128	0.0016	0.000256	0.00083625	9.6e-05	5.274e-05	0.014025	9.975e-05
164	9.27e-05	0.0016654	0.001854	0.0023175	0.0003708	0.0011875	0.00013905	7.518e-05	0.01839	0.0001419
165	7.24e-05	0.0011561	0.001448	0.00181	0.0002896	0.0009425	0.0001086	5.958e-05	0.015345	0.0001125
166	7.87e-05	0.0012254	0.001574	0.0019675	0.0003148	0.00100375	0.00011805	6.522e-05	0.01623	0.00011985
167	8.51e-05	0.0015774	0.001702	0.0021275	0.0003404	0.00112875	0.00012765	7.13e-05	0.01719	0.00013485
168	7.13e-05	0.0011264	0.001394	0.0017825	0.0002852	0.00091375	0.00010515	5.774e-05	0.03048	0.00010905
169	5.68e-05	0.0012617	0.001128	0.00141	0.0002256	0.00074125	8.52e-05	4.53e-05	0.025305	8.835e-05
170	8.6e-05	0.0013057	0.00172	0.00215	0.000344	0.00115125	0.000129	7.276e-05	0.021165	0.00013755
171	6.01e-05	0.0015972	0.001226	0.0015325	0.0002452	0.00082625	9.195e-05	5.194e-05	0.01746	9.855e-05
172	9.21e-05	0.001386	0.001866	0.0023325	0.0003732	0.0011925	0.00013995	7.562e-05	0.04254	0.0001425
173	6.9e-05	0.0014003	0.00138	0.001725	0.000276	0.00090625	0.0001035	5.732e-05	0.014775	0.00010815
174	6.08e-05	0.0010285	0.001216	0.00152	0.0002432	0.00078375	9.12e-05	4.954e-05	0.017385	9.345e-05
175	8.82e-05	0.0013343	0.001772	0.002215	0.0003544	0.00115	0.0001329	7.29e-05	0.025395	0.0001374
176	0.0001119	0.0015862	0.00223	0.0027875	0.000446	0.00146625	0.00016725	9.294e-05	0.05205	0.00017535
177	7.43e-05	0.0014586	0.001486	0.0018575	0.0002972	0.00101125	0.00011145	6.386e-05	0.02745	0.00012075
178	9.73e-05	0.0017116	0.001946	0.0024325	0.0003892	0.0012575	0.00014595	7.982e-05	0.01902	0.0001503
179	7.44e-05	0.0011737	0.00148	0.00185	0.000296	0.00098625	0.0001128	6.236e-05	0.015525	0.00017835
180	8.86e-05	0.0013343	0.001772	0.002215	0.0003544	0.00116	0.0001329	7.556e-05	0.021555	0.0001386
181	8.57e-05	0.0010296	0.00173	0.0021625	0.000346	0.0011525	0.00012975	7.296e-05	0.02124	0.0001377
182	9.74e-05	0.0019943	0.001948	0.002435	0.0003896	0.0012575	0.0001461	7.974e-05	0.038235	0.0001503
183	7.11e-05	0.001991	0.001422	0.0017775	0.0002844	0.00092375	0.00010665	5.836e-05	0.02289	0.00011025
184	7.56e-05	0.0017413	0.001488	0.00186	0.0002976	0.00092875	0.0001116	5.866e-05	0.019365	0.00011085
185	6.39e-05	0.0010714	0.001278	0.0016175	0.0002524	0.00084	9.705e-05	5.206e-05	0.02949	9.9e-05
186	6.18e-05	0.0013211	0.001236	0.001545	0.0002568	0.00079875	9.27e-05	5.032e-05	0.040695	9.465e-05
187	8.61e-05	0.0015884	0.001722	0.0021525	0.0003444	0.001115	0.00012915	7.026e-05	0.01734	0.0001338
188	9.21e-05	0.0016544	0.001842	0.0023025	0.0003684	0.0012025	0.00013815	7.572e-05	0.02226	0.0001437
189	6.08e-05	0.0010285	0.001216	0.00152	0.0002368	0.000785	8.88e-05	5.096e-05	0.013305	9.36e-05
190	8.15e-05	0.0012562	0.00163	0.0020375	0.000326	0.0010775	0.00012225	6.784e-05	0.02817	0.0001287
191	0.000102	0.0020405	0.002048	0.00254	0.000408	0.0013425	0.000153	8.674e-05	0.027405	0.0001605
192	7.01e-05	0.001694	0.001402	0.0017525	0.0002804	0.00094	0.00010515	5.994e-05	0.02262	0.0001122
193	8.21e-05	0.0015312	0.001618	0.0020225	0.0003236	0.00107	0.00012135	6.886e-05	0.0207	0.0001278
194	8.63e-05	0.001309	0.001726	0.0021575	0.0003452	0.001125	0.00012945	7.128e-05	0.03693	0.0001344
195	8e-05	0.0018073	0.001608	0.00201	0.0003216	0.00105	0.0001182	6.652e-05	0.020325	0.0001254
196	8.5e-05	0.0015763	0.0017	0.002085	0.00034	0.0010725	0.0001251	6.8e-05	0.024915	0.0001281
197	8.97e-05	0.0013464	0.001794	0.0022425	0.0003588	0.001185	0.00013455	7.512e-05	0.03714	0.0001422
198	9.29e-05	0.0013816	0.001858	0.0023225	0.0003716	0.0012075	0.00013935	7.654e-05	0.02604	0.0001443
199	7.11e-05	0.0011418	0.001422	0.0017775	0.0002844	0.0009275	0.00010665	5.856e-05	0.02277	0.0001107
